# Supplementary material
Source: publisher site journal article supplement (https://www.dovepress.com/article/436519)
Supplement: Supplementary file 1 [file get_supplementary_file.php]

**Supplementary File 1** Detailed description of neuropsychological tests used

The Trail Making Test (TMT) is a test of attention and executive cognition. Participants were instructed to connect a set of dots with numbers in an ascending order as quickly as possible while maintaining accuracy (Trail Making-Part A – TMT-A), and then to connect a set of dots with numbers and letters in an ascending pattern with the added task of switching between the numbers and letters (Trail Making-Part B – TMT-B). Scoring was based on seconds needed to complete the test with lower scores indicating better cognitive abilities.

The Verbal Fluency test (VF) is a measure of executive cognition that relies also on a language component. Participants were asked to generate as many words as possible in 60 seconds from the semantic category “animals” (semantic fluency subtest) and words beginning with the Greek letter “X” (phonemic fluency subtest). The total score was the sum of the words produced in each subtest with higher scores indicating better cognitive abilities.

The Logical Memory test (LM) is a verbal episodic memory test. Participants were read a story and asked to recite the story from memory immediately after its presentation twice (immediate recall condition) and approximately 20 minutes later (delayed recall condition). The number of correctly recalled information compiled the total score, ranging from 0-32 for the immediate recall condition and 0-16 for the delayed recall condition. Higher scores indicate better memory skills.

The Posner cueing task is a test of visual attention. Participants were instructed to fixate at a cross mark that was presented in the center of the computer screen and press a key to respond as quickly as possible when a target appeared on the left or on the right of the fixation point. The location of the target (valid trial) or the opposite location (invalid trial) may have been cued before target presentation. Total correct responses (0-50) and mean reaction time measured in seconds for correct valid trials and invalid trials were calculated separately. Higher scores in total correct responses but lower scores in mean time scores indicate better cognitive abilities.

Emotional word recognition task has been developed as a visual emotional memory recognition test. It consists of 72 words (36 targets and 36 distractors) selected from the Greek version of the Affective Norms for English Words Lexicon (Palogiannidi, Koutsakis, Iosif, & Potamianos, 2016). Stimuli were chosen based on their valence (24 positive, 24 negative or 24 neutral). In the study phase each word of the 36 targets was presented sequentially for 3.3 seconds in the center of the screen, and after the completion of the study phase, participants were presented sequentially the 72 words (36 targets and 36 distractors) and had to respond in 15 seconds if they remember the word or not. Total recognition score (0-72), True Positive score (0-36) and True Negative score (0-36) were calculated. Higher scores indicate better cognitive abilities.

The Corsi block-tapping task is a measure of visuo-spatial working memory. Nine square frames were impartially arranged on the screen and flashed in a specific ascending sequence. At the end of the sequence presentation, a warning sound signal was informing participants to reproduce the sequence by clicking on the squares that flashed in the same (forward condition) or reversed order (backward condition). Task terminated when participants failed to reproduce two trials of the same sequence length. The spans for forward and backward condition were derived. Higher number of the span indicated better cognitive abilities.

The Stroop task assesses attention and executive functions. Words of four color names (green, blue, red, yellow) were sequentially displayed in the center of the screen with their font color being same (congruent trial) or different (incongruent trial) as the semantic meaning of the word. Participants were instructed to identify as quickly as possible the font color of the presented words using specified keyboard arrows that corresponded to the four colors. Total correct responses (0-50) and mean reaction time for correct congruent trials and incongruent trials were calculated separately, as well as the Stroop effect as calculated by subtracting mean reaction time measured in seconds for correct incongruent trials from the mean reaction time for correct congruent trials. Higher scores in total correct responses but lower scores in mean time scores indicate better cognitive abilities.

**Supplementary Table S1** Cognitive scores and follow-up period of study participants overall and by level of Sleep Quality

| **Cognitive Function Scores** | **All Participants**  **(Ν=2,112)** | **Sleep Quality**† | | ***p*-Value** |
| --- | --- | --- | --- | --- |
| **Good**  **(Ν=1,546)** | **Poor**  **(Ν=566)** |
| *PRIMARY TESTS* |  |  |  |  |
| Verbal Fluency |  |  |  |  |
| Semantic | 21.93 ± 6.00 | 22.21 ± 5.85 | 21.18 ± 6.33 | 0.001 |
| Phonemic | 10.06 ± 3.74 | 10.19 ± 3.74 | 9.70 ± 3.72 | 0.010 |
| Logical Memory |  |  |  |  |
| Immediate recall | 23.17 ± 4.91 | 23.22 ± 4.90 | 23.01 ± 4.95 | 0.385 |
| Delayed recall | 13.41 ± 2.56 | 13.43 ± 2.56 | 13.36 ± 2.55 | 0.596 |
| Trail Making Test |  |  |  |  |
| Part A | 35.31 ± 12.55 | 34.57 ± 12.15 | 37.34 ± 13.36 | <0.001 |
| Part B | 65.72 ± 19.77 | 64.62 ± 18.58 | 68.71 ± 22.43 | <0.001 |
|  | **All Participants**  **(Ν=154)** | **Good**  **(Ν=120)** | **Poor**  **(Ν=34)** | ***p*-Value** |
| Follow-up period, days | 513.08 ± 202.68 | 508.67 ± 203.11 | 528.65 ± 203.38 | 0.614 |
| *SECONDARY TESTS* |  |  |  |  |
| Posner cueing |  |  |  |  |
| Total correct | 43.73 ± 11.41 | 44.06 ± 11.03 | 42.56 ± 12.77 | 0.500 |
| Mean reaction time - valid trials | 0.49 ± 0.12 | 0.48 ± 0.12 | 0.50 ± .015 | 0.356 |
| Mean reaction time - invalid trials | 0.62 ± 0.14 | 0.62 ± 0.13 | 0.61 ± 0.15 | 0.593 |
| Emotional word recognition |  |  |  |  |
| Total correct | 58.16 ± 6.65 | 57.87 ± 6.76 | 59.18 ± 6.24 | 0.319 |
| True positive | 30.72 ± 3.57 | 30.61 ± 3.69 | 31.09 ± 3.14 | 0.496 |
| True negative | 27.44 ± 4.35 | 27.26 ± 4.50 | 28.09 ± 3.79 | 0.336 |
| Corsi block-tapping |  |  |  |  |
| Forward | 5.07 ± 1.92 | 5.13 ± 1.93 | 4.88 ± 1.90 | 0.511 |
| Backward | 5.01 ± 1.95 | 4.94 ± 1.94 | 5.25 ± 2.00 | 0.427 |
| Stroop |  |  |  |  |
| Total correct | 35.86 ± 13.95 | 36.12 ± 13.94 | 34.87 ± 13.94 | 0.662 |
| Mean reaction time - congruent trials | 1.02 ± 0.21 | 1.02 ± 0.22 | 1.04 ± 0.20 | 0.708 |
| Mean reaction time - incongruent trials | 1.11 ± 0.25 | 1.11 ± 0.25 | 1.15 ± 0.22 | 0.394 |

**Note:** Mean ± standard deviation are presented.

**Supplementary Table S2** Sociodemographic and lifestyle characteristics of Epirus Health Study participants by analysis design

| **Characteristics** | **Analysis design** | | | | ***p*-Value** | |
| --- | --- | --- | --- | --- | --- | --- |
| **Cross-sectional**  **(Ν=1,958)** | | **Prospective**  **(Ν=154)** | |  | |
| Age | | 46.82 ± 11.57 | | 44.87 ± 9.63 | | 0.040 a | |
| Female | | 1,178 (60.16) | | 90 (58.44) | | 0.676 b | |
| Education | |  | |  | | <0.001 c | |
| Primary and secondary school* | | 166 (8.46) | | 1 (0.65) | |  | |
| High school** | | 568 (29.04) | | 22 (14.29) | |  | |
| Higher education *** | | 1,222 (62.47) | | 131 (85.06) | |  | |
| PSQI score | | 4.60 ± 2.30 | | 4.53 ± 2.19 | | 0.713 a | |
| BMI | | 26.55 ± 4.91 | | 25.66 ± 4.38 | | 0.030 a | |
| Alcohol consumption | |  | |  | | 0.172 b | |
| Never | | 263 (13.43) | | 17 (11.04) | |  | |
| Less than once / month | | 591 (30.18) | | 36 (23.38) | |  | |
| 1-3 times / month | | 283 (14.45) | | 29 (18.83) | |  | |
| 1-2 times / week | | 574 (29.32) | | 54 (35.06) | |  | |
| Almost everyday | | 247 (12.61) | | 18 (11.69) | |  | |

**Notes:** *Elementary school or junior high school, up to 9 years of education. ** High school, up to 12 years of education. *** University degree/MSc/PhD/Postdoc, more than 13 years of education. a Comparisons using t-test. b Comparisons using x2 test. c Comparisons using Fisher’s exact test. Mean ± standard deviation and frequency (percentage) are presented for continuous and categorical variables, respectively.

**Abbreviations:** PSQI, Pittsburgh Sleep Quality Index; BMI: body mass index.

**Supplementary Table S3** Results of multivariable linear regression for the cross-sectional association between Sleep Quality (binary score) and cognitive function (continuous score) among Epirus Health Study participants

| Sleep Quality † | | | | | | | |
| --- | --- | --- | --- | --- | --- | --- | --- |
| Cognitive Function Scores | **Model 1 a** | | | **Model 2 b** | | | |
| **Beta** | **95%CI** | ***p*-Value** | **Beta** | **95%CI** | | ***p*-Value** |
| Verbal Fluency |  |  |  |  | |  |  |
| Semantic | -0.452 | -0.607, 0.125 | 0.131 | -0.407 | | -0.998, 0.185 | 0.177 |
| Phonemic | -0.241 | -0.136, 0.006 | 0.197 | -0.262 | | -0.628, 0.105 | 0.162 |
| Logical Memory |  |  |  |  | |  |  |
| Immediate recall | 0.150 | -0.307, 0.607 | 0.520 | 0.148 | | -0.314, 0.610 | 0.531 |
| Delayed recall | 0.097 | -0.141, 0.334 | 0.424 | 0.078 | | -0.160, 0.316 | 0.520 |
| Trail Making Test |  |  |  |  | |  |  |
| Part A | 1.274 | 0.139, 2.409 | 0.028 | 1.175 | | 0.044, 2.306 | 0.042 |
| Part B | 1.934 | 0.130, 3.737 | 0.036 | 1.806 | | 0.017, 3.596 | 0.048 |

**Notes:** † Sleep Quality was assessed using the Pittsburgh Sleep Quality Index (PSQI) score. a Adjusted for age (continuous), sex, education. b Adjusted for age (continuous), sex, education, BMI and alcohol consumption.

**Abbreviation:** CI: Confidence interval.

**Supplementary Table S4** Results of multivariable linear regression for the prospective association between Sleep Quality (binary score) and cognitive function (continuous score) among Epirus Health Study participants

| Sleep Quality † | | | | | | | |
| --- | --- | --- | --- | --- | --- | --- | --- |
| Cognitive Function Scores | **Model 1 a** | | | **Model 2 b** | | | |
| **Beta** | **95%CI** | ***p*-Value** | **Beta** | **95%CI** | | ***p*-Value** |
| Posner cueing |  |  |  |  | |  |  |
| Total correct | -0.750 | -5.292, 3.793 | 0.745 | -1.088 | | -5.543, 3.367 | 0.630 |
| Mean reaction time-  valid trials | 0.019 | -0.032, 0.069 | 0.470 | 0.014 | | -0.038, 0.066 | 0.592 |
| Mean reaction time-  invalid trials | -0.034 | -0.086, 0.019 | 0.207 | -0.035 | | -0.089, 0.019 | 0.206 |
| Emotional word recognition |  |  |  |  | |  |  |
| Total correct | 1.047 | -1.539, 3.634 | 0.425 | 1.034 | | -1.609, 3.678 | 0.440 |
| True positive | 0.262 | -1.142, 1.666 | 0.713 | 0.494 | | -0.950, 1.938 | 0.500 |
| True negative | 0.786 | -0.927, 2.499 | 0.366 | 0.541 | | -1.173, 2.254 | 0.534 |
| Corsi block-tapping |  |  |  |  | |  |  |
| Forward | -0.207 | -0.982, 0.567 | 0.597 | -0.257 | | -1.064, 0.549 | 0.529 |
| Backward | 0.412 | -0.380, 1.205 | 0.305 | 0.404 | | -0.425, 1.232 | 0.337 |
| Stroop |  |  |  |  | |  |  |
| Total correct | -0.582 | -5.929, 4.765 | 0.830 | -0.829 | | -6.282, 4.624 | 0.764 |
| Mean reaction time-  congruent trials | -0.014 | -0.091, 0.064 | 0.730 | -0.011 | | -0.091, 0.069 | 0.786 |
| Mean reaction time-  incongruent trials | 0.020 | -0.075, 0.115 | 0.683 | 0.037 | | -0.060, 0.134 | 0.451 |

**Notes:** † Sleep Quality was assessed using the Pittsburgh Sleep Quality Index (PSQI) score. a Adjusted for age (continuous), sex, education. b Adjusted for age (continuous), sex, education, BMI and alcohol consumption.

**Abbreviation:** CI: Confidence interval.

**Supplementary Table S5** Results of multivariable linear regression for interaction between Sleep Quality (continuous) by sex and cognitive function (continuous score) among Epirus Health Study participants

| **Sleep Quality** † | | | | | | | | | | | |
| --- | --- | --- | --- | --- | --- | --- | --- | --- | --- | --- | --- |
| **Cognitive Function**  **Scores** | **Men** | | | | | **Women** | | | | | |
| **Beta** | **95%CI** | | ***p*-Value** | | **Beta** | | **95%CI** | | ***p*-Value** | |
| Verbal Fluency |  |  | | |  |  | |  | |  | |
| Semantic | -0.105 | -0.316, 0.107 | | | 0.330 | -0.111 | | -0.248, 0.027 | | 0.114 | |
| Phonemic | -0.057 | -0.185, 0.071 | 0.381 | | | | -0.066 | | -0.152, 0.021 | | 0.135 |
| Logical Memory |  |  |  | | | |  | |  | |  |
| Immediate recall | 0.028 | -0.144, 0.200 | 0.751 | | | | 0.057 | | -0.048, 0.161 | | 0.288 |
| Delayed recall | 0.036 | -0.053, 0.125 | 0.426 | | | | -0.002 | | -0.056, 0.052 | | 0.947 |
| Trail Making Test |  |  |  | | | |  | |  | |  |
| Part A | 0.216 | -0.162, 0.595 | 0.263 | | | | 0.295 | | 0.020, 0.571 | | 0.035 |
| Part B | 0.419 | -0.232, 1.070 | 0.206 | | | | 0.205 | | -0.208, 0.618 | | 0.331 |

**Notes:** † Sleep Quality was assessed using the Pittsburgh Sleep Quality Index (PSQI) score. Models adjusted for age (continuous), sex, education, BMI, alcohol consumption.

**Abbreviation:** CI: Confidence interval.

**Supplementary Table S6** Results of multivariable linear regression for interaction between Sleep Quality (continuous) by age groups and cognitive function (continuous score) among Epirus Health Study participants

| **Sleep Quality** † | | | | | | | | | | | | | | |
| --- | --- | --- | --- | --- | --- | --- | --- | --- | --- | --- | --- | --- | --- | --- |
| **Cognitive Function**  **Scores** | **Young** | | | | | **Middle-aged** | | | | | | **Old** | | |
| **Beta** | **95%CI** | | ***p*-Value** | | **Beta** | | **95%CI** | | ***p*-Value** | | **Beta** | **95%CI** | ***p*-Value** |
| Verbal Fluency |  |  | | |  |  | |  | |  | |  | | |
| Semantic | -0.238 | -0.466, -0.010 | | | 0.041 | -0.083 | | -0.231, 0.650 | | 0.272 | | -0.116 | -0.416, 0.184 | 0.447 |
| Phonemic | -0.071 | -0.202, 0.060 | 0.288 | | | | -0.079 | | -0.173, 0.016 | | 0.103 | -0.083 | -0.277, 0.110 | 0.397 |
| Logical Memory |  |  |  | | | |  | |  | |  |  | | |
| Immediate recall | 0.097 | -0.077, 0.271 | 0.275 | | | | 0.031 | | -0.087, 0.149 | | 0.604 | -0.077 | -0.325, 0.170 | 0.539 |
| Delayed recall | 0.024 | -0.061, 0.108 | 0.583 | | | | -0.005 | | -0.066, 0.056 | | 0.870 | 0.010 | -0.129, 0.148 | 0.891 |
| Trail Making Test |  |  |  | | | |  | |  | |  |  | | |
| Part A | 0.210 | -0.162, 0.582 | 0.268 | | | | 0.446 | | 0.181, 0.712 | | 0.001 | 0.310 | -0.568, 1.189 | 0.487 |
| Part B | -0.026 | -0.635, 0.583 | 0.933 | | | | 0.662 | | 0.221, 1.103 | | 0.003 | 0.161 | -1.094, 1.415 | 0.801 |

**Notes:** † Sleep Quality was assessed using the Pittsburgh Sleep Quality Index (PSQI) score. Models adjusted for age (continuous), sex, education, BMI, alcohol consumption.

**Abbreviation:** CI: Confidence interval.
